# Supplementary material for: Efficient AntiMycolata Agents by Increasing the Lipophilicity of Known Antibiotics through Multicomponent Reactions
Source: Antibiotics (Basel). 2023 Jan 3;12(1):83. doi: 10.3390/antibiotics12010083 (PMC9854905; doi:10.3390/antibiotics12010083)
Supplement: Supplementary file 1 [file antibiotics-12-00083-s001.zip › Supporting Info II PhysChem Features SwissADME.xlsx]

## Sheet: Sheet1
	Code Name	Canonical SMILES	Formula	MW	#Heavy atoms	#Aromatic heavy atoms	Fraction Csp3	#Rotatable bonds	#H-bond acceptors	#H-bond donors	MR	TPSA	iLOGP	XLOGP3	WLOGP	MLOGP	Silicos-IT Log P	Consensus Log P	ESOL Log S	ESOL Solubility (mg/ml)	ESOL Solubility (mol/l)	ESOL Class	Ali Log S	Ali Solubility (mg/ml)	Ali Solubility (mol/l)	Ali Class	Silicos-IT LogSw	Silicos-IT Solubility (mg/ml)	Silicos-IT Solubility (mol/l)	Silicos-IT class	GI absorption	BBB permeant	Pgp substrate	CYP1A2 inhibitor	CYP2C19 inhibitor	CYP2C9 inhibitor	CYP2D6 inhibitor	CYP3A4 inhibitor	log Kp (cm/s)	Lipinski #violations	Ghose #violations	Veber #violations	Egan #violations	Muegge #violations	Bioavailability Score	PAINS #alerts	Brenk #alerts	Leadlikeness #violations	Synthetic Accessibility
1a	Dapsone	Nc1ccc(cc1)S(=O)(=O)c1ccc(cc1)N	C12H12N2O2S	248.3	17	12	0	2	2	2	67.19	94.56	1.26	0.97	2.78	1.87	0.85	1.55	-2.38	1.03	0.00416	Soluble	-2.54	0.71	0.00286	Soluble	-4.13	0.0185	7.46e-05	Moderately soluble	High	No	No	No	No	No	No	No	-7.13	0	0	0	0	0	0.55	0	1	1	1.92
1b	Sulfadoxine	COc1c(OC)ncnc1NS(=O)(=O)c1ccc(cc1)N	C12H14N4O4S	310.33	21	12	0.17	5	6	2	76.53	124.81	1.86	0.7	1.77	-0.26	-0.2	0.77	-2.3	1.56	0.00504	Soluble	-2.9	0.392	0.00126	Soluble	-4.03	0.0291	9.38e-05	Moderately soluble	High	No	No	No	No	No	No	No	-7.7	0	0	0	0	0	0.55	0	1	0	2.99
6a	NJ001	Nc1ccc(cc1)S(=O)(=O)c1ccc(cc1)N(C(=O)c1ccc(cc1)Cl)C(C(=O)NC(C)(C)C)c1ccc(cc1)Cl	C31H29Cl2N3O4S	610.55	41	24	0.16	10	4	2	163.48	117.95	3.9	6.34	7.48	5.09	5.28	5.62	-7.39	2.47e-05	4.05e-08	Poorly soluble	-8.61	1.51e-06	2.47e-09	Poorly soluble	-10.97	6.48e-09	1.06e-11	Insoluble	Low	No	No	No	No	Yes	Yes	No	-5.52	2	3	0	1	2	0.17	0	1	3	3.88
6b	NJ013	O=C(C(N(c1ccc(cc1)S(=O)(=O)c1ccc(cc1)N)C(=O)C)c1ccncc1)NC1CCCCC1	C27H30N4O4S	506.62	36	18	0.3	9	5	2	138.82	130.84	2.73	3.18	4.8	2.16	2.6	3.1	-4.76	0.0088	1.74e-05	Moderately soluble	-5.6	0.00128	2.52e-06	Moderately soluble	-7.6	1.28e-05	2.53e-08	Poorly soluble	Low	No	Yes	No	Yes	Yes	Yes	Yes	-7.13	1	2	0	0	0	0.55	0	1	2	3.75
6c	NJ005	Nc1ccc(cc1)S(=O)(=O)c1ccc(cc1)N(C1(CCCC1)C(=O)NC(C)(C)C)C(=O)Cc1ccc(cc1)C(F)(F)F	C31H34F3N3O4S	601.68	42	18	0.35	11	7	2	155.71	117.95	4.09	5.26	8.16	4.28	5.24	5.41	-6.48	0.000201	3.35e-07	Poorly soluble	-7.49	1.96e-05	3.26e-08	Poorly soluble	-9.86	8.36e-08	1.39e-10	Poorly soluble	Low	No	Yes	No	Yes	No	Yes	No	-6.24	2	4	1	1	2	0.17	0	1	3	3.71
7a	CM209	COc1c(OC)ncnc1NS(=O)(=O)c1ccc(cc1)N(C(=O)c1ccccc1)C(C(=O)NC1CCCCC1)C(C)C	C30H37N5O6S	595.71	42	18	0.4	13	8	2	160.2	148.2	3.72	4.87	5.3	1.79	2.79	3.69	-6.06	0.000518	8.7e-07	Poorly soluble	-7.72	1.14e-05	1.92e-08	Poorly soluble	-8.22	3.62e-06	6.08e-09	Poorly soluble	Low	No	Yes	No	Yes	Yes	Yes	Yes	-6.48	2	3	2	1	0	0.17	0	0	3	4.73
7b	CM219	COc1ncnc(c1OC)NS(=O)(=O)c1ccc(cc1)N(C(C(=O)NC(C)(C)C)c1ccc(cc1)Cl)C(=O)c1ccccc1	C31H32ClN5O6S	638.13	44	24	0.23	13	8	2	167.82	148.2	3.5	5.01	5.82	2.23	3.6	4.03	-6.5	0.000203	3.17e-07	Poorly soluble	-7.86	8.76e-06	1.37e-08	Poorly soluble	-10.24	3.66e-08	5.73e-11	Insoluble	Low	No	No	No	Yes	Yes	No	Yes	-6.64	2	4	2	1	2	0.17	0	0	3	4.67
9a	CM213	COc1c(OC)ncnc1NS(=O)(=O)c1ccc2c(c1)c(cc(n2)c1ccc(cc1)F)c1ccccc1	C27H21FN4O4S	516.54	37	28	0.07	7	8	1	138.26	111.68	3.8	4.99	6.63	2.56	4.49	4.49	-6.28	0.000268	5.2e-07	Poorly soluble	-7.07	4.35e-05	8.42e-08	Poorly soluble	-10.82	7.8e-09	1.51e-11	Insoluble	Low	No	No	No	No	Yes	Yes	Yes	-5.91	1	3	0	1	0	0.55	0	0	2	3.77
9b	AT139	COc1c(OC)ncnc1NS(=O)(=O)c1ccc2c(c1)c(cc(n2)c1ccc(cc1)C)c1ccccc1	C28H24N4O4S	512.58	37	28	0.11	7	7	1	143.27	111.68	4.04	5.26	6.38	2.39	4.6	4.53	-6.43	0.000191	3.72e-07	Poorly soluble	-7.35	2.26e-05	4.42e-08	Poorly soluble	-10.93	5.98e-09	1.17e-11	Insoluble	Low	No	No	No	Yes	Yes	Yes	Yes	-5.69	1	3	0	1	1	0.55	0	0	2	3.89
9c	CM211	COc1c(OC)ncnc1NS(=O)(=O)c1ccc2c(c1)c(cc(n2)c1ccc(cc1)C(F)(F)F)c1ccccc1	C28H21F3N4O4S	566.55	40	28	0.11	8	10	1	143.3	111.68	3.79	5.78	8.24	2.68	5.16	5.13	-6.98	5.88e-05	1.04e-07	Poorly soluble	-7.89	7.23e-06	1.28e-08	Poorly soluble	-11.37	2.43e-09	4.3e-12	Insoluble	Low	No	No	No	No	Yes	No	Yes	-5.65	1	3	0	1	1	0.55	0	0	3	3.89
9d	AT137	COc1ccc(cc1)c1nc2ccc(cc2c(c1)c1ccccc1)S(=O)(=O)Nc1ncnc(c1OC)OC	C28H24N4O5S	528.58	38	28	0.11	8	8	1	144.79	120.91	3.64	4.86	6.08	1.88	4.14	4.12	-6.2	0.000336	6.36e-07	Poorly soluble	-7.13	3.89e-05	7.35e-08	Poorly soluble	-10.65	1.17e-08	2.21e-11	Insoluble	Low	No	No	No	Yes	Yes	Yes	Yes	-6.07	1	3	0	1	0	0.55	0	0	3	3.88
9e	AT140	COC(=O)c1ccc(cc1)c1nc2ccc(cc2c(c1)c1ccccc1)S(=O)(=O)Nc1ncnc(c1OC)OC	C29H24N4O6S	556.59	40	28	0.1	9	9	1	149.58	137.98	3.75	4.74	5.85	1.79	4.09	4.04	-6.2	0.00035	6.29e-07	Poorly soluble	-7.37	2.39e-05	4.29e-08	Poorly soluble	-10.57	1.5e-08	2.69e-11	Insoluble	Low	No	No	No	Yes	Yes	No	Yes	-6.33	1	3	0	1	0	0.55	0	0	3	3.99
9f	AT093	COc1c(OC)ncnc1NS(=O)(=O)c1ccc2c(c1)c(cc(n2)c1ccc(cc1)Cl)c1ccc(cc1)F	C27H20ClFN4O4S	550.99	38	28	0.07	7	8	1	143.27	111.68	3.81	5.62	7.28	3.03	5.13	4.97	-6.88	7.26e-05	1.32e-07	Poorly soluble	-7.73	1.03e-05	1.87e-08	Poorly soluble	-11.39	2.22e-09	4.03e-12	Insoluble	Low	No	No	No	Yes	Yes	No	Yes	-5.67	1	3	0	1	1	0.55	0	0	2	3.76
9g	AT098	COc1c(OC)ncnc1NS(=O)(=O)c1ccc2c(c1)c(cc(n2)c1ccc(cc1)Cl)c1ccc(cc1)C	C28H23ClN4O4S	547.02	38	28	0.11	7	7	1	148.28	111.68	4.38	5.88	7.03	2.86	5.24	5.08	-7.02	5.23e-05	9.57e-08	Poorly soluble	-8	5.49e-06	1e-08	Poorly soluble	-11.51	1.7e-09	3.1e-12	Insoluble	Low	No	No	No	Yes	Yes	No	Yes	-5.46	1	3	0	1	1	0.55	0	0	2	3.89
9h	AT133	COc1c(OC)ncnc1NS(=O)(=O)c1ccc2c(c1)c(cc(n2)c1ccc(cc1)Cl)c1ccc(cc1)C(F)(F)F	C28H20ClF3N4O4S	601	41	28	0.11	8	10	1	148.31	111.68	4.16	6.4	8.89	3.14	5.81	5.68	-7.58	1.6e-05	2.66e-08	Poorly soluble	-8.54	1.74e-06	2.9e-09	Poorly soluble	-11.94	6.93e-10	1.15e-12	Insoluble	Low	No	No	No	No	Yes	No	Yes	-5.42	1	3	0	1	2	0.55	0	0	3	3.88
9i	AT094	COc1ccc(cc1)c1cc(nc2c1cc(cc2)S(=O)(=O)Nc1ncnc(c1OC)OC)c1ccc(cc1)Cl	C28H23ClN4O5S	563.02	39	28	0.11	8	8	1	149.8	120.91	4.04	5.49	6.73	2.34	4.79	4.68	-6.79	9.07e-05	1.61e-07	Poorly soluble	-7.79	9.19e-06	1.63e-08	Poorly soluble	-11.23	3.32e-09	5.9e-12	Insoluble	Low	No	No	No	Yes	Yes	No	Yes	-5.84	1	3	0	1	1	0.55	0	0	3	3.87
